# Supplementary material
Source: MDPI journal article supplement (https://www.mdpi.com/2079-9276/12/12/144)
Supplement: s1 [file s1]

Supplementary material for

## **Bacterial metal accumulation as a strategy for waste recycling management**

Denise Kölbl<sup>1</sup>, Alma Memic<sup>1</sup>, Holger Schnideritsch<sup>2</sup>, Dominik Wohlmuth<sup>2</sup>, Gerald Klösch<sup>2</sup>,  
Mihaela Albu<sup>3</sup>, and Tetyana Milojevic<sup>1\*</sup>

\*Correspondence to: [tetyana.milojevic@cnrs-orleans.fr](mailto:tetyana.milojevic@cnrs-orleans.fr)

This file contains:

Supplementary Figures S1 to S6

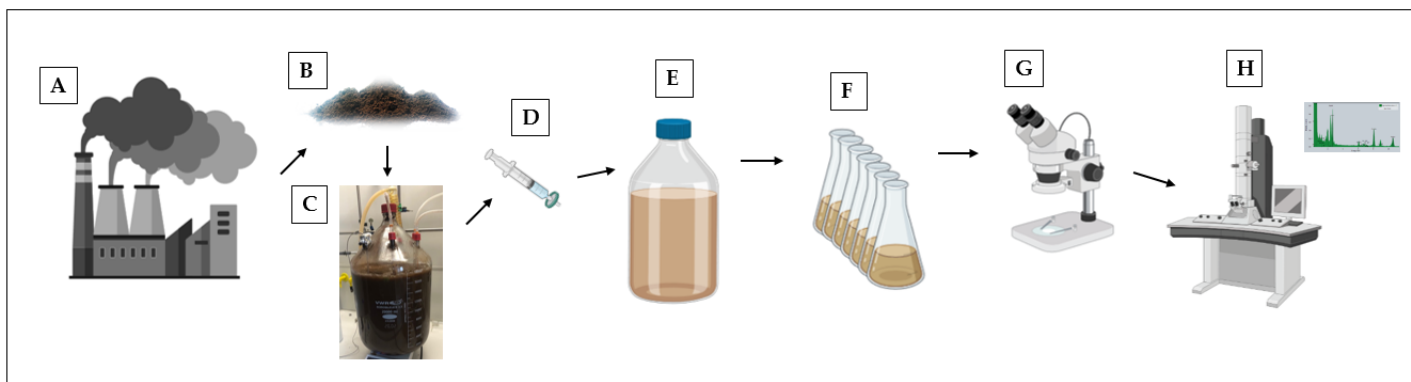

**Figure S1: Scheme of a cascade waste recycling approach.** Steelmaking processes (A) generate a variety of metal-containing waste products. BOF-dust (B) waste (metal composition table in [45]) is generated as a consequence of basic oxygen furnace (BOF) steelmaking processes.

BOF-dust was fed into a liquid *Acidianus manzaensis* culture (C) to test bioleaching abilities of this thermoacidophilic archaeon [45]. After cultivation, the bioleachate was filtered (D) to obtain bioleachate solution (E) for biosorption/bioaccumulation studies. Seven bacterial strains were cultivated (F) on native bioleachate solution (pH 1.70) and screened for cell growth or decay (G). Two strains, *Deinococcus aerius* and *Acidocella aluminidurans* were analysed (H) for metal sorption/accumulation capacities via scanning transmission electron microscopy coupled to energy dispersive spectroscopy (STEM-EDS).

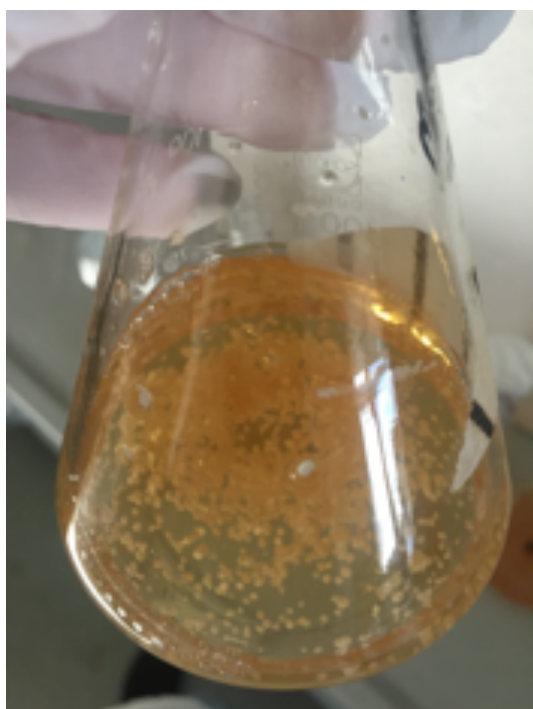

**Figure S2: Precipitated pellets formed in the culture of *S. rimosus* upon contact with metal rich waste product material.**

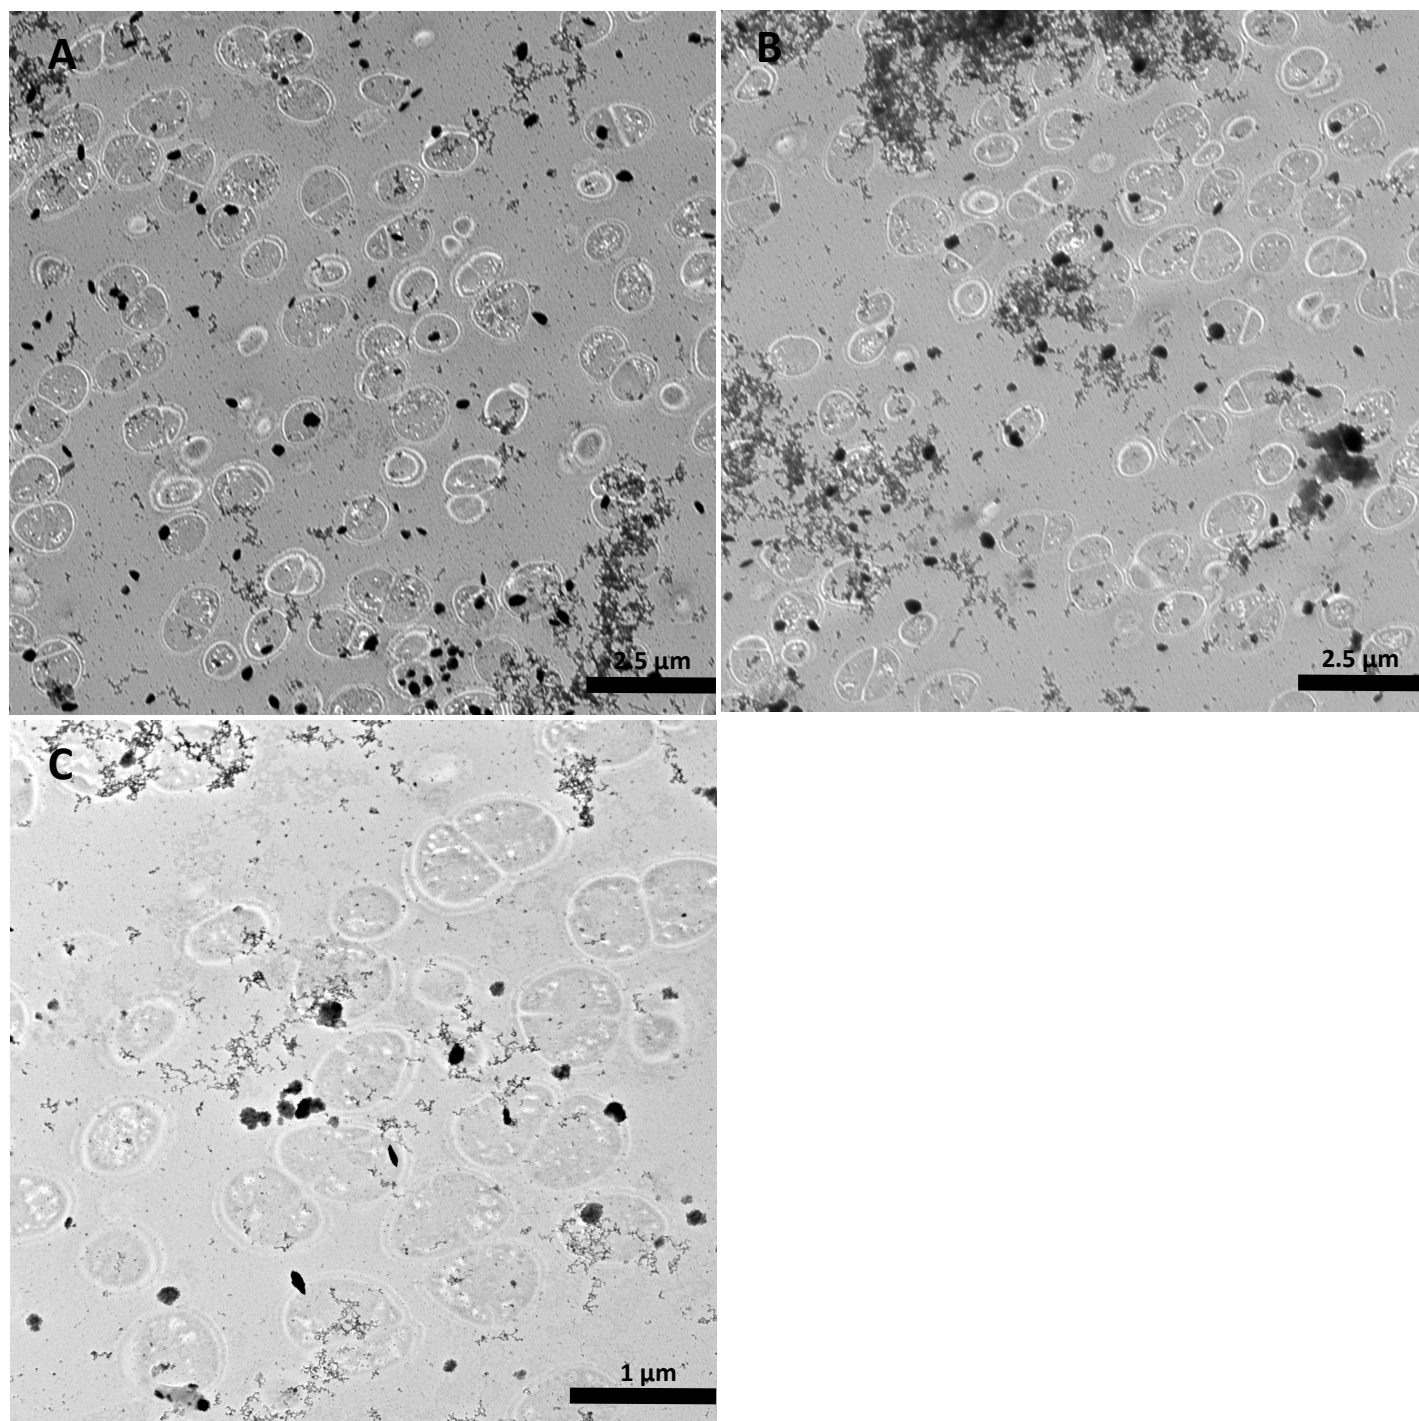

**Figure S3: Additional TEM images of *D. aerius* cells after cultivation on acidic bioleachate solution. A, 10 min of cultivation; B, C, 24 h of cultivation.**



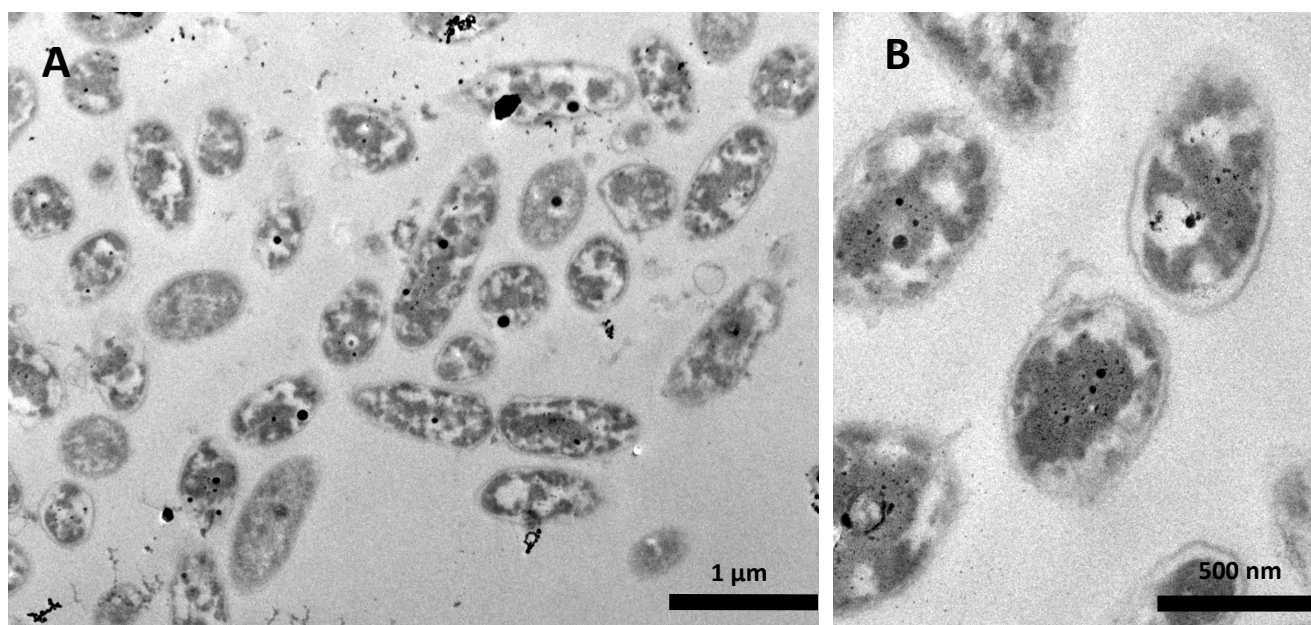

**Figure S4: Additional TEM images of *A. aluminidurans* cells after cultivation on acidic bioleachate solution. A, 10 min of cultivation; B, 24 h of cultivation.**

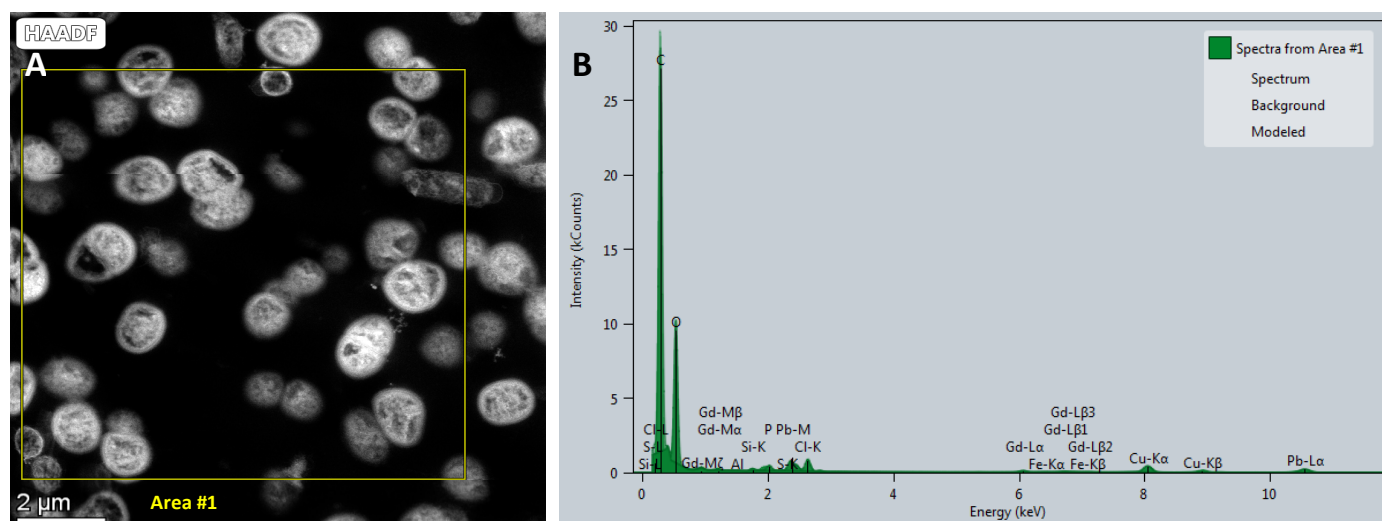

**Figure S5: Additional elemental ultrastructural analysis of *D. aerius* cells cultivated on bioleachate for 24h.**

A, HAADF-STEM image of *D. aerius* cells; B, Energy- dispersive X-ray (EDS) spectra acquired from the depicted area in panel (A). Gadolinium (Gd) and Lead (Pb) peaks in EDS spectra are due to the sample staining procedure for TEM.

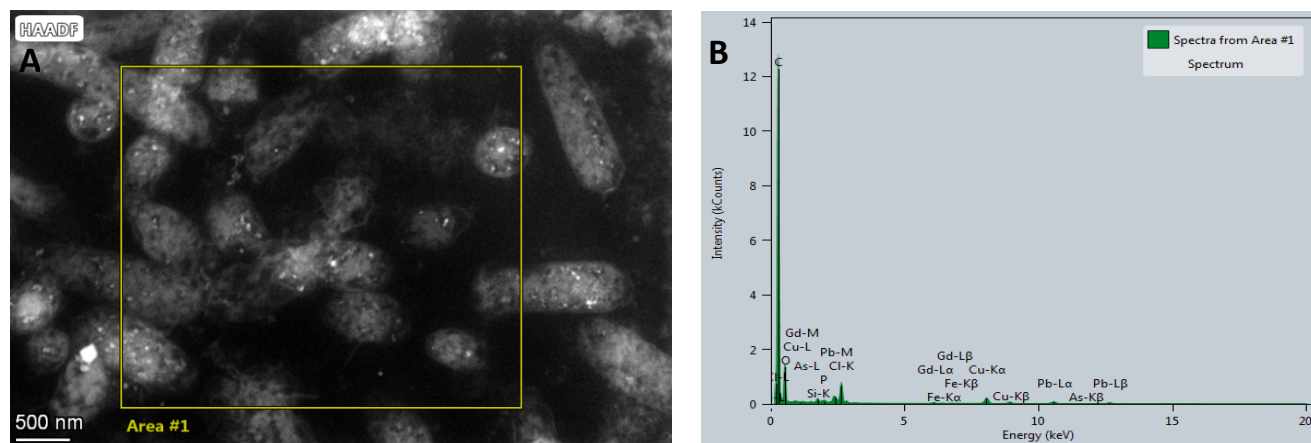

**Figure S6: Additional elemental ultrastructural analysis of *A. aluminidurans* cells cultivated on bioleachate for 24h.**

A, HAADF-STEM image of *A. aluminidurans* cells; B, Energy-dispersive X-ray (EDS) spectra acquired from the depicted area in panel (A). Gadolinium (Gd) and Lead (Pb) peaks in EDS spectra are due to the sample staining procedure for TEM.
